# Supplementary material for: Effectiveness of influenza vaccination in preventing influenza in primary care, Navarre, Spain, 2021/22
Source: PubMed Central journal article supplement (PMC9248265; doi:10.2807/1560-7917.es.2022.27.26.2200488), 2022-06-30
Supplement: 22-00488_CASTILLA_influenza_Supplementary_material.pdf [file 22-00488_CASTILLA_influenza_Supplementary_material.pdf]

## **SUPPLEMENTARY MATERIAL**

**This supplementary material is hosted by *Eurosurveillance* as supporting information alongside the article “Effectiveness of influenza vaccination in preventing influenza in primary care, Navarre, Spain, 2021/22” on behalf of the authors who remain responsible for the accuracy and appropriateness of the content. The same standards for ethics, copyright, attributions and permissions as for the article apply. Supplements are not edited by *Eurosurveillance* and the journal is not responsible for the maintenance of any links or email addresses provided therein.**

**Supplementary Table S1.** Characteristics of the patients with acute respiratory infection included in the test negative case-control analysis including COVID-19 confirmed cases in the control group. Navarre, Spain, 22 November 2021 to 22 May 2022 (n=16,352 patients)

|                                                                     | Laboratory-confirmed |     | Influenza negative |     | <i>P</i> value |
|---------------------------------------------------------------------|----------------------|-----|--------------------|-----|----------------|
|                                                                     | influenza cases      |     | controls           |     |                |
|                                                                     | n                    | %   | n                  | %   |                |
| <b>Total</b>                                                        | 644                  | 100 | 15,708             | 100 |                |
| <b>Age groups (years)</b>                                           |                      |     |                    |     | < 0.001        |
| 9–24                                                                | 213                  | 33  | 2,352              | 15  |                |
| 25–44                                                               | 193                  | 30  | 5,511              | 35  |                |
| 45–64                                                               | 132                  | 21  | 5,373              | 34  |                |
| 65–84                                                               | 79                   | 12  | 1,792              | 11  |                |
| ≥85                                                                 | 27                   | 4   | 680                | 4   |                |
| <b>Sex</b>                                                          |                      |     |                    |     | < 0.001        |
| Male                                                                | 331                  | 51  | 6,371              | 41  |                |
| Female                                                              | 313                  | 49  | 9,337              | 59  |                |
| <b>Major chronic conditions</b>                                     |                      |     |                    |     | 0.575          |
| No                                                                  | 421                  | 65  | 10,436             | 66  |                |
| Yes                                                                 | 223                  | 35  | 5,272              | 34  |                |
| <b>Vaccination status in the current and three previous seasons</b> |                      |     |                    |     | < 0.001        |
| Unvaccinated                                                        | 455                  | 71  | 9,874              | 63  |                |
| No current but any prior dose                                       | 50                   | 8   | 1,700              | 11  |                |
| Current vaccine regardless of prior doses                           | 139                  | 22  | 4,134              | 26  |                |
| <b>COVID-19 infection</b>                                           |                      |     |                    |     | < 0.001        |
| No                                                                  | 624                  | 97  | 10,011             | 64  |                |
| Yes                                                                 | 20                   | 3   | 5,697              | 36  |                |
| <b>Month of sample collection</b>                                   |                      |     |                    |     | < 0.001        |
| Nov 2021                                                            | 4                    | 1   | 534                | 3   |                |
| Dec 2021                                                            | 188                  | 29  | 7,650              | 49  |                |
| Jan 2022                                                            | 100                  | 16  | 3,580              | 23  |                |
| Feb 2022                                                            | 59                   | 9   | 1,292              | 8   |                |
| Mar 2022                                                            | 190                  | 30  | 1,831              | 12  |                |
| Apr 2022                                                            | 74                   | 12  | 459                | 3   |                |
| May 2022                                                            | 29                   | 5   | 632                | 2   |                |

**Supplementary Table S2.** Sensitivity analysis of effectiveness of influenza vaccination in preventing laboratory-confirmed influenza at primary care level overall, by age groups and in the target population, including COVID-19 confirmed cases in the control group. Navarre, Spain, 22 November 2021 to 22 May 2022 (n=16,352 patients)

|                                           | Cases/<br>controls | Crude vaccine<br>effectiveness, %<br>(95% CI) | Adjusted vaccine<br>effectiveness, %<br>(95% CI) <sup>a</sup> |
|-------------------------------------------|--------------------|-----------------------------------------------|---------------------------------------------------------------|
| <b>All patients</b>                       |                    |                                               |                                                               |
| <b>Current season only</b>                |                    |                                               |                                                               |
| Unvaccinated                              | 505/11,574         | Reference                                     | Reference                                                     |
| Vaccinated                                | 139/4,134          | 23 (7 to 36)                                  | 30 (10 to 46)                                                 |
| <b>Current and three previous seasons</b> |                    |                                               |                                                               |
| Unvaccinated                              | 455/9,874          | Reference                                     | Reference                                                     |
| No current but any prior dose             | 50/1,700           | 36 (14 to 53)                                 | 28 (-5 to 43)                                                 |
| Current vaccine regardless of prior doses | 139/4,134          | 27 (11 to 40)                                 | 33 (13 to 48)                                                 |
| <b>Aged ≤64 years</b>                     |                    |                                               |                                                               |
| <b>Current season only</b>                |                    |                                               |                                                               |
| Unvaccinated                              | 490/11,069         | Reference                                     | Reference                                                     |
| Vaccinated                                | 48/2,167           | 50 (32 to 63)                                 | 39 (16 to 55)                                                 |
| <b>Current and three previous seasons</b> |                    |                                               |                                                               |
| Unvaccinated                              | 443/9,545          | Reference                                     | Reference                                                     |
| No current but any prior dose             | 47/1,524           | 34 (10 to 51)                                 | 21 (-8 to 42)                                                 |
| Current vaccine regardless of prior doses | 48/2,167           | 52 (35 to 65)                                 | 41 (19 to 57)                                                 |
| <b>Age ≥65 years</b>                      |                    |                                               |                                                               |
| <b>Current season only</b>                |                    |                                               |                                                               |
| Unvaccinated                              | 15/505             | Reference                                     | Reference                                                     |
| Vaccinated                                | 91/1,967           | -56 (-171 to 11)                              | -9 (-97 to 40)                                                |
| <b>Current and three previous seasons</b> |                    |                                               |                                                               |
| Unvaccinated                              | 12/329             | Reference                                     | Reference                                                     |
| No current but any prior dose             | 3/176              | 53 (-68 to 87)                                | 8 (-257 to 76)                                                |
| Current vaccine regardless of prior doses | 91/1,967           | -27 (-134 to 31)                              | -7 (-106 to 44)                                               |
| <b>Target population <sup>b</sup></b>     |                    |                                               |                                                               |
| <b>Current season only</b>                |                    |                                               |                                                               |
| Unvaccinated                              | 143/3,280          | Reference                                     | Reference                                                     |
| Vaccinated                                | 116/3,065          | 13 (-11 to 32)                                | 22 (-9 to 45)                                                 |
| <b>Current and three previous seasons</b> |                    |                                               |                                                               |
| Unvaccinated                              | 121/2,597          | Reference                                     | Reference                                                     |
| No current but any prior dose             | 22/683             | 31 (-10 to 56)                                | 12 (-43 to 45)                                                |
| Current vaccine regardless of prior doses | 116/3,065          | 19 (-5 to 37)                                 | 24 (-7 to 46)                                                 |

CI, confidence interval.

<sup>a</sup> Vaccine effectiveness adjusted by age groups (9-24, 25-44, 45-64, 65-84 and ≥85 years), sex, presence of major chronic conditions, and month.

<sup>b</sup> Target population includes people aged 60 years or older and those aged 6 months or over people with major chronic conditions.

**Supplementary Table S3.** Sensitivity analysis of effectiveness of influenza vaccination in preventing laboratory-confirmed influenza at primary care level by calendar period and against A(H3N2) subtype, including COVID-19 confirmed cases in the control group. Navarre, Spain, 22 November 2021 to 22 May 2022 (n=16,352 patients)

|                                           | Cases/<br>controls | Crude vaccine<br>effectiveness, %<br>(95% CI) | Adjusted vaccine<br>effectiveness, %<br>(95% CI) <sup>a</sup> |
|-------------------------------------------|--------------------|-----------------------------------------------|---------------------------------------------------------------|
| <b>November 2021 to January 2022</b>      |                    |                                               |                                                               |
| <b>Current season only</b>                |                    |                                               |                                                               |
| Unvaccinated                              | 250/2,651          | Reference                                     | Reference                                                     |
| Vaccinated                                | 102/1,293          | 17 (-6 to 34)                                 | 40 (16 to 57)                                                 |
| <b>Current and three previous seasons</b> |                    |                                               |                                                               |
| Unvaccinated                              | 217/2,255          | Reference                                     | Reference                                                     |
| No current but any prior dose             | 33/396             | 13 (-27 to 41)                                | -4 (-54 to 30)                                                |
| Current vaccine regardless of prior doses | 102/1,293          | 18 (-5 to 36)                                 | 40 (15 to 57)                                                 |
| <b>February 2022 to May 2022</b>          |                    |                                               |                                                               |
| <b>Current season only</b>                |                    |                                               |                                                               |
| Unvaccinated                              | 255/8,923          | Reference                                     | Reference                                                     |
| Vaccinated                                | 37/2,841           | 54 (35 to 68)                                 | 18 (-23 to 45)                                                |
| <b>Current and three previous seasons</b> |                    |                                               |                                                               |
| Unvaccinated                              | 238/7,619          | Reference                                     | Reference                                                     |
| No current but any prior dose             | 17/1,304           | 58 (31 to 75)                                 | 43 (6 to 65)                                                  |
| Current vaccine regardless of prior doses | 37/2,841           | 58 (41 to 71)                                 | 24 (-14 to 46)                                                |
| <b>A(H3N2) subtype</b>                    |                    |                                               |                                                               |
| <b>Current season only</b>                |                    |                                               |                                                               |
| Unvaccinated                              | 397/11,574         | Reference                                     | Reference                                                     |
| Vaccinated                                | 116/4,134          | 18 (-1 to 34)                                 | 32 (10 to 49)                                                 |
| <b>Current and three previous seasons</b> |                    |                                               |                                                               |
| Unvaccinated                              | 357/9,874          | Reference                                     | Reference                                                     |
| No current but any prior dose             | 40/1,700           | 35 (9 to 53)                                  | 20 (-12 to 43)                                                |
| Current vaccine regardless of prior doses | 116/4,134          | 22 (4 to 37)                                  | 35 (13 to 51)                                                 |

CI: confidence interval.

<sup>a</sup> Vaccine effectiveness adjusted by age groups (9-24, 25-44, 45-64, 65-84 and ≥85 years), sex, presence of major chronic conditions, and month.
